# Supplementary material for: Dual application of synthesized SnO2nanoparticles in ion chromatography for sensitive fluorescence determination of ketoprofen in human serum, urine, and canal water samples
Source: Royal Society of Chemistry journal article supplement (doi:10.1039/c7nj01757j), 2017-01-01
Supplement: c7nj01757j1.pdf [file c7nj01757j1.pdf]

## Dual application of synthesized SnO<sub>2</sub> nanoparticles in ion chromatography for sensitive fluorescence determination of ketoprofen in human serum, urine and canal water samples

Nadeem Muhammad<sup>a</sup>, Weixia Li<sup>a</sup>, Qamar Subhani<sup>a, b</sup>, Fenglian Wang<sup>a</sup>, Yong-Gang Zhao, Yan Zhu<sup>a,\*</sup>

<sup>a</sup>Department of chemistry, Xixi Campus, Zhejiang University, Hangzhou 310028, China.

<sup>b</sup>Higher Education Department, Punjab, Lahore, Pakistan.

(\* ) Corresponding author:

Tel.: +86 571 88273637 Fax: +86 571 88823446.

E-mail address: [zhuyan@zju.edu.cn](mailto:zhuyan@zju.edu.cn) (Y. Zhu)

### Contents

|                                                                                                                           |   |
|---------------------------------------------------------------------------------------------------------------------------|---|
| Figure S-2– Average size diameter of 50 random SnO <sub>2</sub> NPs .....                                                 | 1 |
| Figure S-1– Scanning of KP in basic media .....                                                                           | 2 |
| Figure S-3 – Effect of different amount of sorbent and NaBH <sub>4</sub> concentration on KP fluorescence intensity ..... | 2 |
| Figure S-4 – Effect of agitation time on fluorescence intensity of KP.....                                                | 3 |
| Figure S-5 – Calibration plot for KP obtained using standard solution.....                                                | 3 |

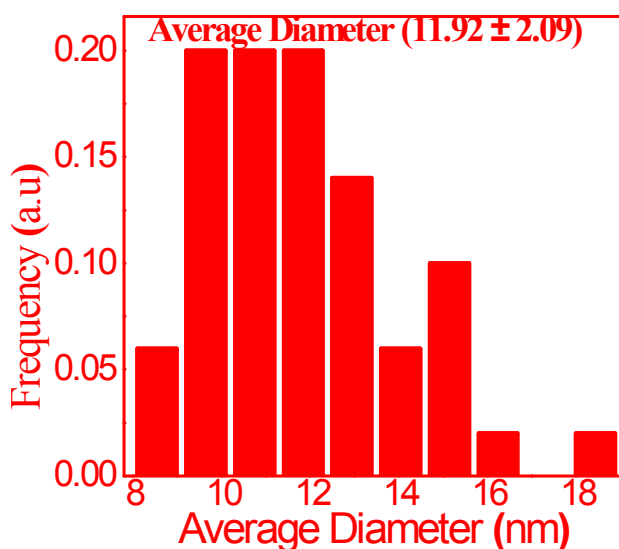

Figure S-1– Average size diameter of 50 random SnO<sub>2</sub> NPs

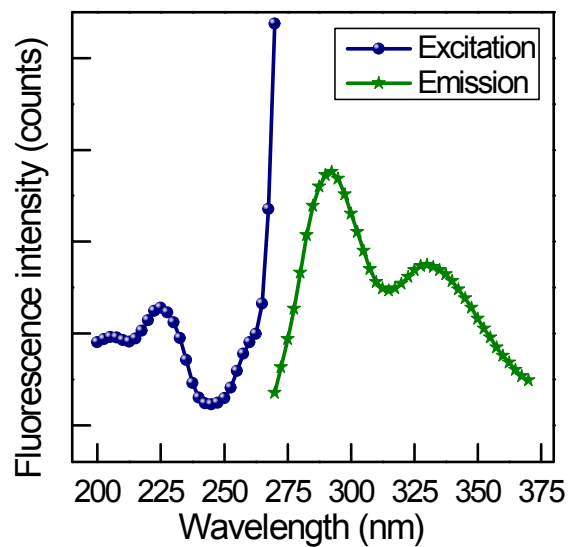

Fig. S-2 The fluorescence excitation and emission spectra of KP in basic media and

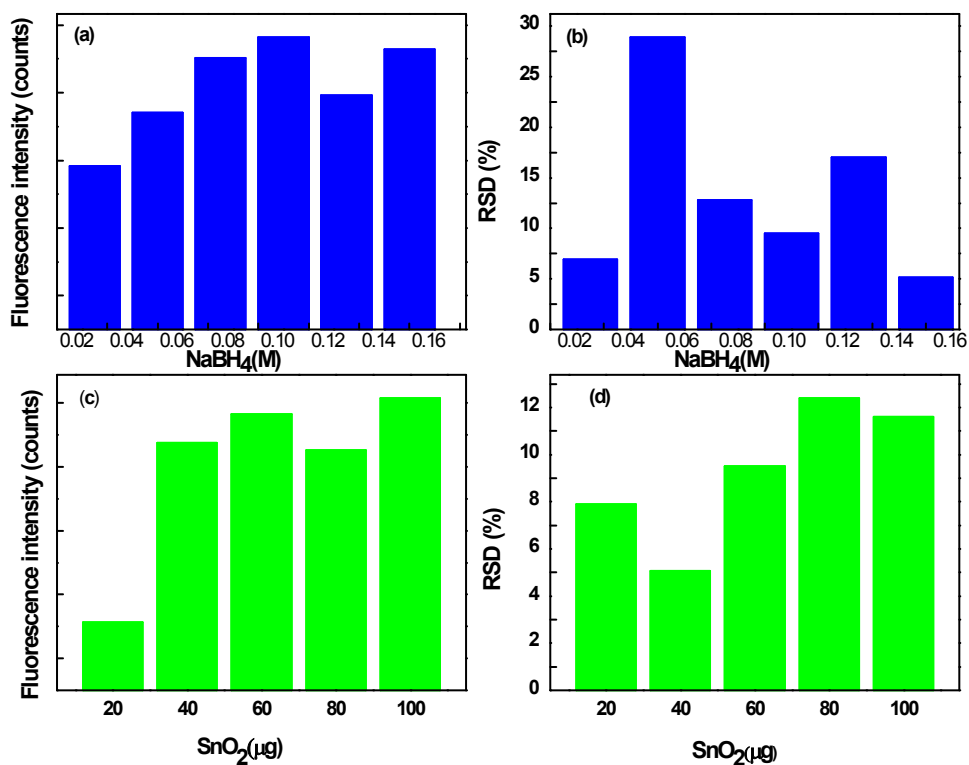

Fig. S3 (a) Effect of NaBH<sub>4</sub> concentration on KP fluorescent intensity and (b) RSDs of respective amount; (c) Effect of sorbent amount on the fluorescence intensity of KP and (d) RSDs of each amount (n=5).

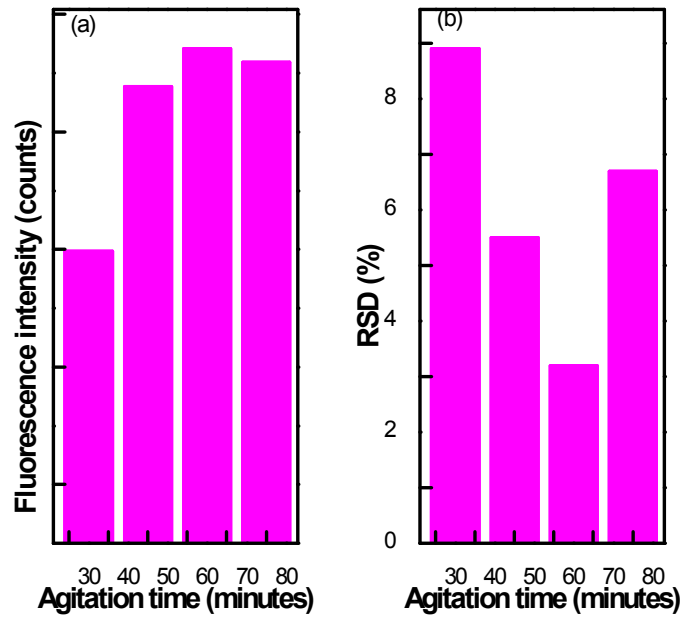

Fig. S4 (a) Effect of agitation time on KP fluorescent intensity (b) RSDs of respective time.

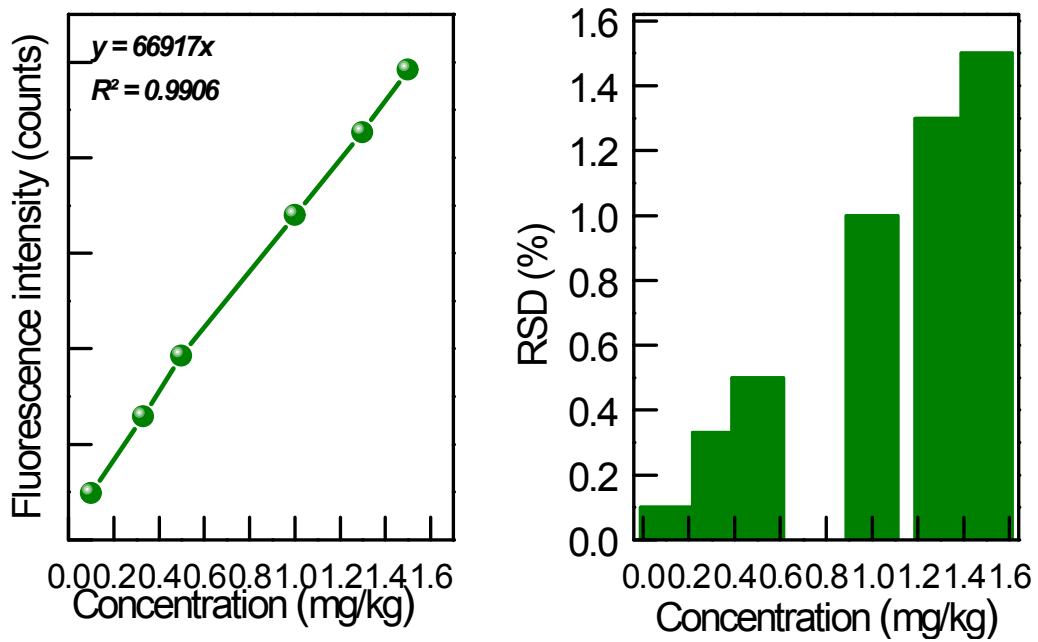

Fig. S-5 Calibration plot for KP obtained using standard solution.
